# Supplementary material
Source: Springer Nature journal article supplement (https://www.springermedizin.de/resource/supplementary/12884_2012_765_MOESM3_ESM.pdf/9458160)
Supplement: MOESM3 [file 9458160]

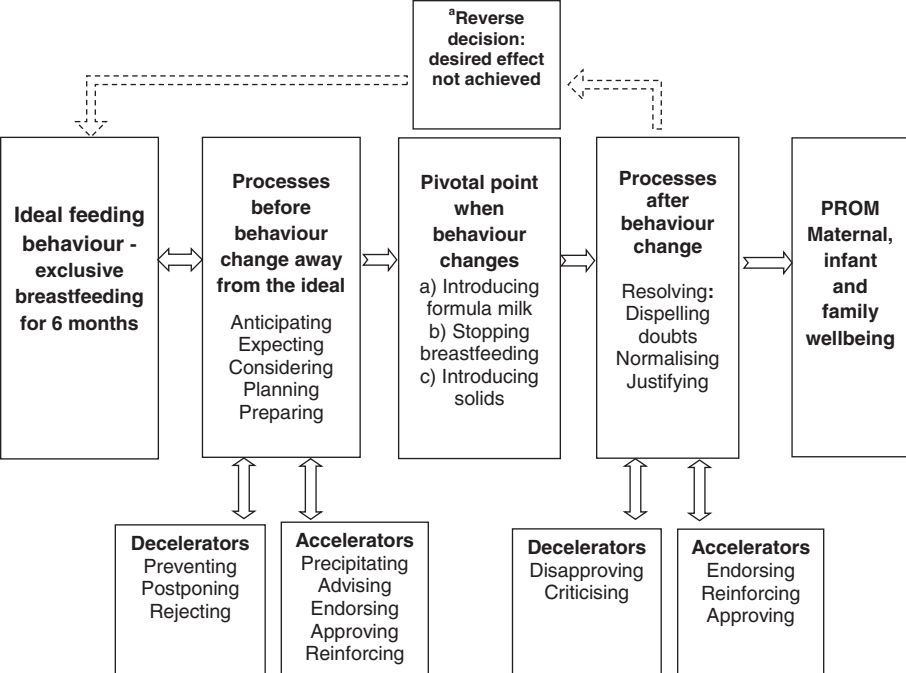

<sup>a</sup>Our mapping of reversing a behaviour change back to the ideal recognises parents' view of the reversal. We acknowledge that this does not meet the WHO definition of exclusive breastfeeding
